# Supplementary material
Source: PubMed Central journal article supplement (PMC6707927)
Supplement: JB.00741-18-s0001.pdf [file JB.00741-18-s0001.pdf]

SUPPLEMENTARY MATERIAL

**Supplementary Table S1. SadC (TM) mutants defective for interaction with MotC isolated in a bacterial two-hybrid screen.**

| Plasmid isolate | Point mutation*       | Predicted location of mutation in full length SadC |
|-----------------|-----------------------|----------------------------------------------------|
| 1               | L82P                  | TM3                                                |
| 2               | L94P                  | TM3                                                |
| 3               | L134R                 | TM5                                                |
| 4               | L29P<br>L148M         | TM1<br>Between TM5 and TM6                         |
| 5               | L32Q<br>V59E          | TM1<br>TM2                                         |
| 6               | W36R<br>L152P         | TM1<br>TM5                                         |
| 7               | L66R<br>F136S         | TM2<br>TM5                                         |
| 8               | W67R<br>F139L         | TM2<br>TM5                                         |
| 9               | P85A<br>S140P         | TM3<br>TM5                                         |
| 10              | L116P<br><b>F136Y</b> | TM4<br>TM5                                         |
| 11              | G22D<br>L57Q<br>I91T  | TM1<br>TM2<br>TM3                                  |
| 12              | L37Q<br>A133V         | TM1<br>TM5                                         |
| 13              | L66P                  | TM2                                                |
| 14              | Q86H                  | TM3                                                |
| 15              | L94Q<br>F166Y         | TM3<br>TM6                                         |
| 16              | Y112C                 | TM4                                                |
| 17              | L117P                 | TM4                                                |
| 18              | L30P<br>W171G         | TM1<br>TM6                                         |

|    |                                 |                                          |
|----|---------------------------------|------------------------------------------|
| 19 | R20Q<br>L63P                    | Before TM1<br>TM2                        |
| 20 | F121L<br>S140P                  | TM4<br>TM5                               |
| 21 | L98P                            | TM3                                      |
| 22 | L13P<br>A133D                   | Before TM1<br>TM5                        |
| 23 | Y44F<br>L134P                   | TM1<br>TM5                               |
| 24 | D79G                            | Between TM2 and TM3                      |
| 25 | Y44N<br>T49S<br>A90V<br>I142F   | TM1<br>Between TM1 and TM2<br>TM3<br>TM5 |
| 26 | L104Q<br>R130H<br>I142T         | TM4<br>TM5<br>TM5                        |
| 27 | Y77F<br>L114Q<br>L134Q<br>S140P | Between TM2 and TM3<br>TM4<br>TM5<br>TM5 |

\*Bolded alleles were retested for interaction with MotC and other phenotypes as described in the text.

6  
7  
8

9 **Supplementary Table S2. Strains used in this study.**  
 10

| Strain Name                         | Genotype/Description                                                                               | Source               |
|-------------------------------------|----------------------------------------------------------------------------------------------------|----------------------|
| <b><i>E. coli</i> strains</b>       |                                                                                                    |                      |
| S17-1 $\lambda$ pir                 | <i>thi pro hsdR- hsdM+ <math>\Delta</math>recA RP4-2::TcMu-Km::Tn7</i>                             | (1)                  |
| BTH101                              | <i>F, cya<sup>-99</sup>, araD139, galE15, galK16, rpsL1 (Str<sup>r</sup>), hsdR2, mcrA1, mcrB1</i> | Euromedex            |
| S17-1 $\lambda$ pir                 | pmq30, SadC-3xFLAG KI construct, Gm <sup>R</sup>                                                   | This study           |
| S17-1 $\lambda$ pir                 | pmq30, SadC-3xFLAG L94P KI construct, Gm <sup>R</sup>                                              | This study           |
| <b><i>P. aeruginosa</i> strains</b> |                                                                                                    |                      |
| SMC 232                             | PA14 wild type (WT)                                                                                | (Rahme et al., 1995) |
| SMC 6365                            | WT ( <i>gfp-motD</i> )                                                                             | (2)                  |
| SMC 6366                            | $\Delta$ <i>bifA</i> ( <i>gfp-motD</i> )                                                           | (3)                  |
| SMC 7562                            | $\Delta$ <i>bifA</i> $\Delta$ <i>motAB</i> ( <i>gfp-motD</i> )                                     | This study           |
| SMC 3351                            | $\Delta$ <i>bifA</i>                                                                               | (4)                  |
| SMC 5770                            | $\Delta$ <i>bifA</i> $\Delta$ <i>motAB</i>                                                         | (3)                  |
| SMC 5769                            | $\Delta$ <i>motAB</i>                                                                              | (3)                  |
| SMC 5684                            | $\Delta$ <i>motCD</i>                                                                              | (3)                  |
| SMC 7563                            | $\Delta$ <i>bifA</i> $\Delta$ <i>motCD</i>                                                         | This study           |
| SMC 8238                            | SadC-3xFLAG                                                                                        | This study           |
| SMC 8239                            | SadC-3xFLAG L94P                                                                                   | This study           |
| SMC 8240                            | WT pMotAB                                                                                          | This study           |
| SMC 7659                            | $\Delta$ <i>motCD</i> pmq72 empty vector                                                           | This study           |
| SMC 8241                            | $\Delta$ <i>motCD</i> pMotAB                                                                       | This study           |
| SMC 4045                            | $\Delta$ <i>sadC</i> pmq72 empty vector                                                            | (5)                  |
| SMC 8242                            | $\Delta$ <i>sadC</i> pMotAB                                                                        | This study           |

11  
 12  
 13

14 **Supplementary Table S3. Plasmids used in this study.**  
 15

| Plasmid Name        | Description                                                                                      | Source     |
|---------------------|--------------------------------------------------------------------------------------------------|------------|
| pMQ30               | Shuttle vector for yeast cloning and Gram-negative allelic replacement, Gm <sup>r</sup>          | (6)        |
| pmq30               | SadC-3xFLAG cloned into pmq30, Gm <sup>R</sup>                                                   | This study |
| pmq30               | SadC-3xFLAG L94P cloned into pmq30, Gm <sup>R</sup>                                              | This study |
| pMQ72               | Shuttle vector for yeast cloning and arabinose-inducible gene expression, Gm <sup>r</sup>        | (6)        |
| pKT25               | BACTH vector allowing fusion to the C-terminus of the <i>cyaA</i> T25 fragment, Kan <sup>r</sup> | Euromedex  |
| pKNT25              | BACTH vector allowing fusion to the N-terminus of the <i>cyaA</i> T25 fragment, Kan <sup>r</sup> | Euromedex  |
| pUT18               | BACTH vector allowing fusion to the N-terminus of the <i>cyaA</i> T18 fragment, Amp <sup>r</sup> | Euromedex  |
| pUT18C              | BACTH vector allowing fusion to the C-terminus of the <i>cyaA</i> T18 fragment, Amp <sup>r</sup> | Euromedex  |
| pKT25- <i>zip</i>   | Leucine zipper of GCN4 fused to T25 in pKT25, Kan <sup>r</sup>                                   | Euromedex  |
| pUT18C- <i>zip</i>  | Leucine zipper of GCN4 fused to T18 in pUT18C, Amp <sup>r</sup>                                  | Euromedex  |
| pUT18C- <i>sadC</i> | Full length <i>sadC</i> cloned into pUT18C, Amp <sup>r</sup>                                     | This study |
| pUT18C- <i>roeA</i> | Full length <i>roeA</i> cloned into pUT18C, Amp <sup>r</sup>                                     | This study |
| pKT25- <i>motA</i>  | Full length <i>motA</i> with a C-terminal 6xHis tag cloned into pKT25, Kan <sup>r</sup>          | (7)        |
| pKT25- <i>motC</i>  | Full length <i>motC</i> cloned into pKT25, Kan                                                   | (7)        |
| pUT18C-             | Transmembrane domain of <i>sadC</i> (amino acids 1-187)                                          | This study |

|                                |                                                                                              |            |
|--------------------------------|----------------------------------------------------------------------------------------------|------------|
| <i>sadC</i> (TM)               | cloned into pUT18C, Amp <sup>r</sup>                                                         |            |
| pUT18C-<br><i>sadC</i> (cyto)  | Cytoplasmic domain of <i>sadC</i> (amino acids 188-375) cloned into pUT18C, Amp <sup>r</sup> | This study |
| pUT18C-<br><i>roeA</i> (TM)    | Transmembrane domain of <i>roeA</i> (amino acids 1-197) cloned into pUT18C, Amp <sup>r</sup> | This study |
| pUT18C-<br><i>roeA</i> (cyto)  | Cytoplasmic domain of <i>roeA</i> (amino acids 1-187) cloned into pUT18C, Amp <sup>r</sup>   | This study |
| pUT18C-<br><i>sadC</i> (L82P)  | <i>sadC</i> (L82P) cloned into pUT18C, Amp <sup>r</sup>                                      | This study |
| pUT18C-<br><i>sadC</i> (L94P)  | <i>sadC</i> (L94P) cloned into pUT18C, Amp <sup>r</sup>                                      | This study |
| pUT18C-<br><i>sadC</i> (L134R) | <i>sadC</i> (L134R) cloned into pUT18C, Amp <sup>r</sup>                                     | This study |
| pKT25-<br><i>sadC</i> (L82P)   | <i>sadC</i> (L82P) cloned into pKT25, Kan <sup>r</sup>                                       | This study |
| pKT25-<br><i>sadC</i> (L94P)   | <i>sadC</i> (L94P) cloned into pKT25, Kan <sup>r</sup>                                       | This study |
| pKT25-<br><i>sadC</i> (L134R)  | <i>sadC</i> (L134R) cloned into pKT25, Kan <sup>r</sup>                                      | This study |

16  
17  
18

19 **Supplementary Table S4. Oligonucleotide primers used in this study.**  
 20

| <b>Primer Name</b>                                                        | <b>Primer Sequence*</b>                               |
|---------------------------------------------------------------------------|-------------------------------------------------------|
| B2H-sadC-F                                                                | NNNNNNTCTAGAGATGCGCACAGACAAGCCTC                      |
| B2H-sadC-R                                                                | NNNNNNGGATCCTCGGCACTGGTGACCTCCCA                      |
| SadC 1-187 BTH R                                                          | GGCGGGATCCTCGCGCATGCGTTGCCGCATC                       |
| SadC 188-375 BTH F                                                        | GGCGTCTAGAGCAGCGCCGCTATGCCTTG                         |
| SadC 188-375 BTH R                                                        | GGCGGGATCCTCGGCACTGGTGACCTCCCAG                       |
| RoeA 1-197 BTH R                                                          | GCGGGGATCCTCCCCGTGCCAGAGGATCAG                        |
| RoeA 198-398 BTH F                                                        | GGCGTCTAGAGCACGTGCGCAACCTGCGC                         |
| RoeA 198-398 BTH R                                                        | GGCGGGATCCTCCCGCAGGCTTTCCGCGAG                        |
| SadC L82P For                                                             | GTTACGCCGATCCCAGCCCGACCGAGCCGCAGGTGC                  |
| SadC L82P Rev                                                             | GCACCTGCGGCTCGGT <u>C</u> GGCTGGGATCGGCGTAAC          |
| SadC L94P For                                                             | GGTGGCGATCGCCTGGCC <u>G</u> ACCTATTTCTCTATCACGTC      |
| SadC L94P Rev                                                             | GACGTGATAGAGGAAATAGGT <u>C</u> GGCCAGGCGATCGCCAC<br>C |
| SadC L134R For                                                            | CGCCCGCTGTGCGGGCG <u>C</u> GGCGTTCATCGC               |
| SadC L134R Rev                                                            | GCGATGAACGCC <u>C</u> GCGCCGCACAGCGGGCG               |
| SadC F136Y For                                                            | CGCTGTGCGGCGCTGGCGT <u>A</u> CATCGCTTTTTCCG           |
| SadC F136Y Rev                                                            | CCGGAAAAAGCGATG <u>T</u> ACGCCAGCGCCGCACAGC           |
| B2H-MotA For                                                              | GGCGTCTAGAGATGTCAAAAATCATCGGCATCATCG                  |
| B2H-MotA Rev<br>(used a His tagged<br>template for this<br>amplification) | GGCG GGATCC TC <b>GTGGTGATGGTGGTGGTG</b>              |
| B2H-MotC For                                                              | GGCGTCTAGA G ATGGATGTGCTCAGCCTGGTC                    |

|                                       |                                                                                                          |
|---------------------------------------|----------------------------------------------------------------------------------------------------------|
| B2H-MotC Rev                          | GGCGGGATCC TC GTCCATGAAGCCTTGCAGC                                                                        |
| SadC native RBS<br>pMQ72 F            | caactctctactgtttctccatacccgTTTTTGGTCTTCAGGCGGGTAATTCCG<br>AATG                                           |
| SadC-His pMQ72 R                      | taatctgtatcaggctgaaaatcttctctcatccgctca <b>GTGGTGATGGTGGTG</b><br><b>GTGGGCACTGGTGACCTCCCAGG</b>         |
| Linker + 3x FLAG G-<br>Block sequence | GGCGGCAGCGGCGGCGGCAGCGGCGGCGACTACAAAGACCATGACG<br>GTGATTATAAAGATCATGATATCGACTACAAAGATGACGACGATAAA<br>TAG |
| SadC-3x FLAG KI F_1<br>upstream       | tgtaaacgacggccagtgccaagcttgcattgctgCCGATGCCAGCTGGTTGACC                                                  |
| SadC-3x FLAG KI R_2                   | CGCTGTTTCAGAGGAGGCTTGTCTGTGCGCATGGGCTCCGTCC<br>CGTAATGGCACCTGG                                           |
| SadC-3x FLAG KI F_3                   | CGACTACAAAGATGACGACGATAAATAGGTGCCTGACATACG<br>GGTCGGCGAGCGACGTC                                          |
| SadC-3x FLAG KI F_4<br>downstream     | ccatgattacgaattcgagctcggtaccgggatccTCAGGCGTGGGGCAGGAACA<br>G                                             |

21

22 \* In primer sequences, uppercase boldface letters indicate a 6xHis tag, lowercase letters indicate  
23 sequence complementary to pMQ72, and underlined letters indicate point mutations.

24

25

26 **Literature Cited.**

- 27 1. Simon R, Priefer U, Puhler A. 1983. A broad host range mobilization system for in vivo  
28 genetic engineering: transposon mutagenesis in gram negative bacteria. Nat Biotech  
29 1:784-791.
- 30 2. Rahme LG, Stevens EJ, Wolfort SF, Shao J, Tompkins RG, Ausubel FM. 1995. Common  
31 virulence factors for bacterial pathogenicity in plants and animals. Science 268:1899-902.
- 32 3. Kuchma SL, Delalez NJ, Filkins LM, Snavely EA, Armitage JP, O'Toole GA. 2015.  
33 Cyclic di-GMP-mediated repression of swarming motility by *Pseudomonas aeruginosa*  
34 PA14 requires the MotAB stator. J Bacteriol 197:420-30.
- 35 4. Kuchma SL, Brothers KM, Merritt JH, Liberati NT, Ausubel FM, O'Toole GA. 2007.  
36 BifA, a cyclic-Di-GMP phosphodiesterase, inversely regulates biofilm formation and  
37 swarming motility by *Pseudomonas aeruginosa* PA14. J Bacteriol 189:8165-78.
- 38 5. Merritt JH, Brothers KM, Kuchma SL, O'Toole GA. 2007. SadC reciprocally influences  
39 biofilm formation and swarming motility via modulation of exopolysaccharide  
40 production and flagellar function. Journal of bacteriology 189:8154-64.
- 41 6. Shanks RM, Caiazza NC, Hinsa SM, Toutain CM, O'Toole GA. 2006. *Saccharomyces*  
42 *cerevisiae*-based molecular tool kit for manipulation of genes from gram-negative  
43 bacteria. Appl Environ Microbiol 72:5027-36.
- 44 7. Baker AE, Diepold A, Kuchma SL, Scott JE, Ha DG, Orazi G, Armitage JP, O'Toole GA.  
45 2016. PilZ domain protein FlgZ Mediates cyclic di-GMP-dependent swarming motility  
46 control in *Pseudomonas aeruginosa*. J Bacteriol 198:1837-46.

47

48
